# 1 **NHBA is processed by kallikrein from human saliva**

2

3 Elisa Pantano<sup>1</sup>, Sara Marchi<sup>1</sup>, Massimiliano Biagini<sup>1</sup>, Martina Di Fede<sup>1#a</sup>, Vincenzo Nardi-

4 Dei<sup>2</sup>, Silvia Rossi Paccani<sup>1</sup>, Mariagrazia Pizza<sup>1</sup> and Elena Cartocci<sup>1\*</sup>

<sup>1</sup> GSK, Siena, Italy

<sup>2</sup> GSK, Wavre, Belgium

<sup>#a</sup>current address: Institute für Virologie und Medizinische Biochemie, Münster, Germany

\*corresponding author

[elena.cartocci@gsk.com](mailto:elena.cartocci@gsk.com)

## 5 Abstract

6 Neisserial Heparin Binding Antigen (NHBA) is a surface-exposed lipoprotein and a component of  
 7 the Bexsero vaccine. NHBA is characterized by the presence of a highly conserved Arg-rich region  
 8 involved in binding to heparin and heparin sulphate proteoglycans present on the surface of host  
 9 epithelial cells, suggesting a possible role of NHBA during *N. meningitidis* colonization. NHBA has  
 10 been shown to be cleaved by the bacterial NalP protein, a meningococcal protease and by human  
 11 lactoferrin (hLF), a host protease present in different body fluids (saliva, breast milk and serum).  
 12 Cleavage occurs upstream or downstream the Arg-rich region. Since the human nasopharynx is the  
 13 only known reservoir of infection, we further investigated the susceptibility of NHBA to human  
 14 proteases present in the saliva to assess whether proteolytic cleavage could happen during the initial  
 15 steps of colonization. Here we show that human saliva proteolytically cleaves NHBA; and  
 16 identified human kallikrein 1 (KLK1) as the main protease responsible for this cleavage. Kallikrein  
 17 is an important enzyme present in blood plasma, lymph, urine, saliva, pancreatic juices, and other  
 18 body fluids that catalyze the proteolysis of several human proteins. We report the *in vitro*  
 19 characterization of NHBA cleavage by kallikrein; the identification of the cleavage in the  
 20 recombinant NHBA protein and, on the native protein, when expressed on live bacteria. Overall,  
 21 this findings provide new insights on NHBA as target of host proteases, highlights a potential role  
 22 of NHBA in the *Neisseria meningitidis* nasopharyngeal colonization, and of kallikrein as a  
 23 defensive agent against meningococcal infection.

# Introduction

*Neisseria meningitidis* is a pathogenic, encapsulated, aerobic gram-negative diplococcus, member of the *Neisseriae* family. It is an obligate commensal in man and colonizes the nasopharyngeal mucosa without affecting the host, a phenomenon known as carriage recognized since 1890 [1]. In nonepidemic settings, approximately 10% of healthy individuals at any time carry *Neisseria meningitidis* in the oropharyngeal tract. Transmission of bacteria occurs via direct contact or through dispersion of respiratory droplets from a healthy carrier or an infected person to a susceptible individual. Although often protected by a polysaccharide capsule, meningococci are particularly sensitive to desiccation; thus, spread from one individual to another necessitates close contact [4]. In fact, closed or semi-closed settings, such as residential schools and military recruit camps, facilitate meningococcal transmission resulting in a dramatic increase of carriage rate, which may approach 100%.

Occasionally, shortly after the onset of colonization, *N. meningitidis* penetrates the mucosal membrane and enters the bloodstream, causing various forms of disease [5]. The most common clinical presentations of invasive infections include meningitis and severe sepsis with an often fatal outcome; other diseases, such as septic arthritis, pneumonia, purulent pericarditis, conjunctivitis, otitis, sinusitis and urethritis, occur more rarely [5].

Meningococcal serogroups B and C are responsible for the majority of meningitidis cases in Europe, Y serogroup is relevant in the United States [8], whereas African epidemics are mainly attributable to the A strain. While effective vaccines based on capsular polysaccharides against serogroups A, C, W and Y are available, different strategies have been pursued for developing a vaccine against the serogroup B being its capsular polysaccharide structurally identical to a component of the human fetal neural cell-adhesion molecule [24]. In 2000, genome mining and subsequent reverse vaccinology analysis brought to the discovery of three main protein antigens. These proteins, present as single antigen or as fusion protein, were formulated with the Outer

Membrane Vesicles from a New Zealand outbreak strain (NZ98/254) shown to be protective in a immunization campaign in New Zealand [6]. Nowadays, Bexsero, is a multicomponent vaccine against *Neisseria meningitidis* serogroup B [20].

Neisseral Heparin Binding Antigen (NHBA), previously named as GNA2132 (Genome-derived *Neisseria* Antigen 2132), is one of the three main protein antigens of the Bexsero vaccine. NHBA is a surfaced-exposed lipoprotein, its *nhba* gene is ubiquitous in meningococcal strains of all different serogroups and it has also been found in several other *Neisseria* species, including *N. lactamica*, *N. polysaccharea* and *N. Flavescens* [7]. Recent studies on NHBA have shown that this protein is implicated in different steps of meningococcal pathogenesis, including bacterial adhesion to epithelial cells [16], biofilm formation [25], bacterial survival in the blood, and vascular leakage [15]. It is also able to bind heparin *in vitro* through an Arginine-rich region [7] and this ability may point to a role of NHBA in the protection of unencapsulated meningococci against complement [15].

The primary amino-acid sequence of NHBA, from strain 2996, comprises approximately 450 residues and its structure can be divided into two main domains: an N-terminal region (residues 1 to ~230), marked as an intrinsically unfolded region, and a C-terminal region, whose structure, organized in  $\beta$ -barrel (residues 305-426) with high thermal stability, has been solved recently by NMR spectroscopy and X ray diffraction [20] [21]. A highly conserved Arginine-rich motif, responsible for protein binding to heparin and heparin sulfate proteoglycans [15] [7], (residues 235–245) is located between the N- and C-terminal regions [20] [21]. It has been reported [7] that NHBA can be processed upstream or downstream of the Arg-rich region by the bacterial NalP protease and by human lactoferrin (hLF), respectively. Since hLF is a protease present in different body fluids, including saliva, we hypothesized that NHBA protein could be cleaved by proteases contained in the saliva during the initial step of *N. meningitis* colonization of the nasopharyngeal mucosa. Here we show that NHBA is proteolysed during incubation with saliva and identified allikrein 1 as responsible for the cleavage. The NHBA fragments generated by kallikrein cleavage

76 were characterized by mass spectrometry and shown to be identical to the NHBA fragments  
77 generated by human lactoferrin proteolytic cleavage.  
78 Finally, we show that the native NHBA surface exposed on live bacterial surface is cleaved by  
79 saliva and hKLK1 and that the cleavage results in the release of the C-fragment in the culture  
80 supernatant.

# Materials and Methods

## SDS-PAGE and Western Blot analysis

Proteins were separated by SDS-PAGE electrophoresis using 4-12 % or 12 % polyacrylamide NuPAGE Bis-Tris Precast Gels (Invitrogen). For SDS-PAGE analysis, gels were stained with SimplyBlue Safe Stain (Invitrogen). For Western blot (WB) analysis, 1 ml of culture medium supernatant was recovered, filtered 0.22  $\mu$ m and precipitated in 10% (v/v) trichloroacetic acid. Protein pellets were solubilized in 50  $\mu$ l of Novex LDS Sample Buffer 1X (Thermo Fisher) containing Tris Base 0.1 M and NuPage Sample reducing agent 1X (Thermo Fisher). Precipitated proteins were run on SDS-Page and the gel was transferred onto nitrocellulose membranes. Western blots were performed according to standard procedures. NHBA full-length protein and its C-terminal fragments were identified with polyclonal mouse antisera raised against the recombinant NHBA full-length protein (working dilution 1:1000) or against the recombinant C2 fragment (working dilution 1:1000), respectively. An anti-mouse antiserum conjugated to horseradish peroxidase (32230 Thermo Fisher) was used as secondary antibody. Bands were visualized with Super Signal West Pico Chemiluminescent Substrate (Thermo Fisher) following the manufacturer's instructions.

## Expression and purification of recombinant NHBA proteins

Recombinant wt and  $\Delta$ -Arg NHBA protein was expressed in *E. coli* BL21 (DE3) strain by using EnPresso B growth kit (BioSilta) supplemented with 100  $\mu$ g/ml ampicillin. Bacteria were grown at 30°C for 16 h, and protein expression was induced by the addition of 1 mM isopropyl  $\beta$ -D-1-thiogalactopyranoside (IPTG) (Sigma) at 25°C for 24 h. The soluble proteins were extracted by sonication in 50 mM NaH<sub>2</sub>PO<sub>4</sub>, 300 mM NaCl, 10 mM imidazole, pH=8, supplemented with protease inhibitors (cOmplete™, EDTA-free Protease Inhibitor Cocktail, Roche), followed by

centrifugation to remove cell debris. Recombinant proteins were purified from 0.22  $\mu$ m filtered supernatant by affinity chromatography with HisTrap HP column (GE Healthcare) using an AktaPurifier System (GE Healthcare) following the recommended procedure. After washing, elution was performed by gradient step from 0 to 250 mM imidazole in 20 CV. Eluted sample was dialyzed at 4 °C overnight against 10 mM NaH<sub>2</sub>PO<sub>4</sub>, pH=7, buffer using Snake Skin Dialysis Tubing, 10,000 MWCO, 22 mm (Thermo Scientific), and a second step of purification was performed to obtain a high pure product. WT NHBA dialyzed sample was load on HiTrap heparin HP column (GE Healthcare) using an AktaPurifier System (GE Healthcare) following the recommended procedure. After washing, elution was performed by gradient step from 0 to 500 mM NaCl.  $\Delta$ -arg NHBA dialyzed sample was load on HiTrap Q HP column (GE Healthcare) using an AktaPurifier System (GE Healthcare) following the recommended procedure. After washing, elution was performed by gradient step from 0 to 500 mM NaCl. For both samples, to exchange the buffer, eluted samples were dialyzed at 4 °C overnight against PBS using Snake Skin Dialysis Tubing, 10,000 MWCO, 22 mm (Thermo Scientific). Protein content was quantified using the BCA Kit (Thermo Fischer Scientific). Purity was checked by SDS-PAGE analysis, as well as by SEC-UPLC loading the sample on BEH200 4.6x300mm column (Waters). Size exclusion chromatography was performed using 10 mM NaH<sub>2</sub>PO<sub>4</sub>, 400 mM (NH<sub>4</sub>)<sub>2</sub>SO<sub>4</sub>, pH=6, buffer. Endotoxin content was quantified by LAL assay using ENDOSAFE instrument (Charles River).

## **NHBA in vitro cleavage by saliva and kallikrein1**

NHBA recombinant proteins, obtained as previously described, were incubated with saliva (Human saliva lot BRH1325364 from Seralab) in a ratio of 1 ml of saliva per mg of recombinant proteins, or with recombinant human kallikrein1 (2337-SE R&D System) or with kallikrein1 purified from human plasma (K2638 Sigma Aldrich) at different ratio, from 1:500 to 1:500000. Samples were incubated at 37°C overnight; then they were centrifuged for 1 minute and analysed on SDS-PAGE.

## 130 **Proteomic analysis of saliva**

131 For proteomic analysis, human saliva (Human saliva lot BRH1325364 from Seralab) was  
132 fractionated by anion exchange chromatography. Dialyzed saliva has been loaded on Column Mini  
133 Q PE 4.6/50 GE Healthcare (0.8 ml CV), with a flow of 0.2 ml/min on a Acquity- HPLC system  
134 (Waters) previously equilibrated with buffer 25 mM Tris pH 8.0.

135 Elution was performed with a flow of 1 ml/min in a gradient mode: from 250 mM Tris, pH 8, to 25  
136 mM Tris HCl 0,5 M NaCl, pH 8 in 20 CV and proteins were collected in fractions of 0,5 ml  
137 volume. NHBA cleavage activity of each fractions were evaluated incubating NHBA at a  
138 concentration of 1 mg/ml with an equal volume of each fraction as previously described. Protein  
139 fractions positive for proteolytic activity on NHBA protein were pooled and precipitated in 10%  
140 (v/v) trichloroacetic acid and 0.04% (w/v) sodium deoxycholate. Protein pellets were solubilized in  
141 50 µl of 0.1% (w/v) Rapigest™ (Waters, MA, USA) and 1mM DTT and 50 mM ammonium  
142 bicarbonate, boiled at 100°C for 10 min. After cooling down, 1µg of LysC/trypsin mix (Promega)  
143 was added and the reaction was performed overnight. Digestions were stopped with 0.1% final  
144 formic acid, desalted using OASIS HLB cartridges (Waters) as described by the manufacturer, dried  
145 in a Centrivap Concentrator (Labconco) and resuspended in 100 µl of 3% (v/v) acetonitrile  
146 (ACNcan) and 0.1% (v/v) formic acid. An Acquity HPLC instrument (Waters) was coupled on-line  
147 to a Q Exactive Plus (Thermo Fisher Scientific) with an electrospray ion source (Thermo Fisher  
148 Scientific). The peptide mixture (10 µl) was loaded onto a C18-reversed phase column Acquity  
149 UPLC peptide CSH C18 130Å, 1.7µm 1 x 150 mm and separated with a linear gradient of 28–85%  
150 buffer B (0.1% (v/v) formic acid in ACN) at a flow rate of 50 µL/min and 50 °C. MS data was  
151 acquired in positive mode using a data-dependent acquisition (DDA) dynamically choosing the five  
152 most abundant precursor ions from the survey scan (300–1600  $m/z$ ) at 70,000 resolution for HCD  
153 fragmentation. Automatic Gain Control (AGC) was set at 3E+6. For MS/MS acquisition, the  
154 isolation of precursors was performed with a 3  $m/z$  window and MS/MS scans were acquired at a  
155 resolution of 17,500 at 200  $m/z$  with normalized collision energy of 26 eV. The mass spectrometric



raw data were analyzed with the PEAKS software ver. 8 (Bioinformatics Solutions Inc., ON, Canada) for de novo sequencing, database matching and identification. Peptide scoring for identification was based on a database search with an initial allowed mass deviation of the precursor ion of up to 15 ppm. The allowed fragment mass deviation was 0.05 Da. Protein identification from MS/MS spectra was performed against NCBI *Homo sapiens* (Human) protein database (112,970,924 protein entries; 41,399,473,309 residues) combined with common contaminants (human keratins and autolytic fragments of trypsin) with a FDR set at 0.1%. Enzyme specificity was set as C-terminal to Arg and Lys, with a maximum of four missed cleavages. N-terminal pyroGlu, Met oxidation and Gln/Asn deamidation were set as variable modifications.

## **Purification of NHBA fragments after cleavage**

NHBA recombinant protein was digested with saliva and recombinant KLK1 as previously described and the obtained digested fragments were separated on His Spin Trap devices (GE Healthcare) following the costumer procedure. The His Spin Trap was equilibrated with 50 mM NaH<sub>2</sub>PO<sub>4</sub> pH8, 300 mM NaCl, NHBA cleaved recombinant protein was loaded on the devices and after washing C-fragments was eluted with 50 mM NaH<sub>2</sub>PO<sub>4</sub> pH8, 300 mM NaCl, 500 mM Imidazol.

## **Mass Spectrometry analysis of the cleaved purified C-term fragments**

The C fragment recovered from His Spin Trap elution fraction was analysed by Mass Spectrometry. The acidified protein solutions were loaded onto a Protein Microtrap cartridge (from 60 to 100 pmols), desalted for 2 min with 0.1% (v/v) formic acid at a flow rate of 200 ml/min and eluted directly into the mass spectrometer using a step gradient of acetonitrile (55% (v/v) acetonitrile, 0.1% (v/v) formic acid). Spectra were acquired in positive mode on a SynaptG2 HDMS mass

spectrometer (Waters) equipped with a Z-spray ESI source. The quadrupole profile was optimized to ensure the best transmission of all ions generated during the ionization process. Mass spectra were smoothed, centroided and deconvoluted using MassLynx vers. 4.1 (Waters).

## Bacterial strains and growth conditions

*N. meningitidis* wt strain MC58 [22] and the  $\Delta$ NalP and  $\Delta$ NHBA MC58 strains [7] were cultured on GC agar plates (Difco) at 37 °C plus 5% CO<sub>2</sub>. Overnight colonies grown on GC agar plate were used to start a culture in 25ml of GC medium (Difco) in flask: OD<sub>600nm</sub> ~ 0.1 was used as start culture density. Liquid culture was grown at 32 °C plus 5% CO<sub>2</sub>, under aerobic condition (180 rpm) until OD<sub>600nm</sub> ~ 0.4 and then used for experimentation. Bacteria were incubated with saliva (Human saliva lot BRH1325364 from Seralab), human plasma-purified KLK1 (K2638 Sigma Aldrich) or liquid GC medium, as negative control, for 30 minutes. Culture medium supernatant was recovered and used for Western blot analysis; while bacteria were used for FACS analysis.

## Flow Cytometry analysis

Bacteria, obtained as previously described, were washed and incubated for 1 hour, at room temperature, with polyclonal mouse antiserum raised against NHBA C-terminal fragment. After a washing step, samples were incubated for 30 minutes, at room temperature, with Alexa flour 488-conjugated goat anti mouse IgG secondary antibody (Life Technologies). All washing steps and antibodies dilutions were performed using 1 % (w/v) BSA in PBS. Labeled bacteria were washed and fixed for 1 hour, at room temperature, using 2% (v/v) formaldehyde (Carlo Erba Reagents) in PBS. Samples were analyzed with BD FACS Canto™ II system (BD Bioscience) using FlowJo software.

## Results

### NHBA is cleaved by human saliva

Lactoferrin is known to be present in various biological fluids, such as blood, milk, tears, nasal secretions and saliva [9], and it has been reported to be a protease responsible for NHBA cleavage [7]. To explore the possibility that NHBA protein may be processed during initial *Neisseria* colonization of the nasopharynx, we assessed whether saliva, which contains hLF, was able to proteolytically cleave the protein. To this end, human saliva from a pool of donors was incubated with recombinant NHBA (from NZ98/254 strain) protein. After 4 hours, samples were recovered and analyzed by SDS-PAGE. As shown in Fig 1, saliva treatment of NHBA protein gave rise to two main fragments with an apparent molecular weight of approximately 40 kDa and 20 kDa (lane 6), similarly to those produced by hLF [7]. Significantly, a recombinant NHBA mutant protein, wherein all Arginines of the Arginine rich region have been deleted (NHBA  $\Delta$ Arg), was not cleaved in saliva (lanes 9 and 10), indicating that the presence of the Arginine rich region was necessary for the proteolytic cleavage.

#### Fig. 1. Saliva promotes NHBA cleavage

SDS PAGE of NHBA incubated with human saliva. Lane 1: pool of saliva; lane 2: pool of saliva incubated for 4 hours at 37°C; lane 3: NHBA wt recombinant protein alone; lane 4: NHBA wt recombinant protein incubated for 4 hours at 37°C; lane 5: NHBA wt recombinant protein and saliva; lane 6: NHBA wt recombinant protein incubated with saliva 4 hours at 37°C; lane 7: NHBA  $\Delta$ Arg recombinant protein alone; lane 8: NHBA  $\Delta$ Arg recombinant protein incubated for 4 hours at 37°C; lane 9: NHBA  $\Delta$ Arg recombinant protein with saliva; lane 10: NHBA  $\Delta$ Arg recombinant protein incubated with saliva for 4 hours at 37°C.

## 231 **Lactoferrin is not the main actor of NHBA cleavage in human saliva**

232 To verify whether the protease responsible for NHBA cleavage in saliva was the hLF, proteins  
 233 contained in saliva were partially fractionated by Anion Exchange Chromatography. Proteins were  
 234 eluted by increasing ionic strength (Fig. S1), and each recovered fraction was examined for both the  
 235 ability to cleave NHBA protein and for the presence of hLf. The proteolytic activity of each fraction  
 236 on NHBA protein was monitored by SDS-PAGE analysis (Fig. 2B), while the presence of hLf was  
 237 assessed by Western blot analysis (Fig. 2A). Surprisingly, while the hLF was mainly detected in  
 238 fractions from 33 to 37, from 48 to 50 and 59 and 60, the majority of the proteolytic cleavage of  
 239 NHBA was observed from fraction 50 to fraction 56, suggesting that hLF was not the main factor,  
 240 in saliva, responsible for cleavage of NHBA. To further confirm this experimental evidence, either  
 241 the fractions with major cleavage activity (52-54) or those containing hLF (33-37) were pooled and  
 242 concentrated, and their ability to cleave NHBA was tested. As shown in Fig 3, a pool of fraction 52-  
 243 54 completely processed NHBA protein after overnight incubation (lane 4). On the contrary, only a  
 244 minimal activity was visible for a pool of fractions 33-37 positive for hLf (lane 5). These  
 245 experimental evidences led to the conclusion that, in addition to hLF, another unknown human  
 246 protease in saliva was able to cleave NHBA protein and cleavage of NHBA in saliva resulted  
 247 mainly from its activity.

248

## 249 **Fig. 2. Lactoferrin in Saliva fractions and their activity on NHBA cleavage.**

250 Western Blot on saliva recovered fractions against lactoferrin. Recombinant lactoferrin (rLF), saliva  
 251 (saliva) and the fractions from AEC were loaded on the gel. Lactoferrin is present in fractions from  
 252 34-37, 48-50 and 59-60. B) SDS Page of the fractions obtained through the saliva partial  
 253 purification incubated with NHBA. All the samples were maintained at 37°C ON and then loaded  
 254 on SDS-Page. In the first four lanes, NHBA recombinant protein, saliva, saliva post dialysis and  
 255 saliva post dialysis incubated with NHBA as reported as control. From number 2 to number 64, are

256 reported the different fractions obtained from saliva purification after incubation with NHBA  
257 recombinant protein.

258

### 259 **Fig. 3. Lactoferrin in saliva is not the main responsible for NHBA cleavage**

260 SDS Page on NHBA processed by recovered and concentrated saliva fractions. All the samples  
261 were maintained at 37°C ON and then loaded on SDS-Page. Lane 1: NHBA recombinant protein;  
262 lane 2: saliva; lane 3: NHBA recombinant protein incubated with saliva; lane 4: NHBA  
263 recombinant protein incubated with pool of fractions from 52-54 concentrated; lane 5: NHBA  
264 recombinant protein incubated with concentrated pool of fractions positive for lactoferrin in  
265 Western Blotting.

266

### 267 **Kallikrein 1 is the main factor responsible for NHBA cleavage in** 268 **human saliva**

269 To identify the main protease responsible for NHBA processing in saliva, a pool of fractions (52-  
270 54) with the highest NHBA proteolytic activity was analyzed by mass spectrometry based  
271 proteomics. Proteins were therefore precipitated, digested with trypsin and the resulting peptides  
272 were subjected to LC-MS/MS analysis. Protein identification from mass spectrometry data was  
273 performed against the *Homo sapiens* database publically available in NCBI. Among the identified  
274 proteins, we found the protease kallikrein 1 (hKLK1), whose identity was assigned by the MS/MS  
275 sequence of two peptides (Fig. 4). This isoform of kallikrein is specifically expressed in human  
276 kidney, pancreas and salivary glands [21] and its cleavage site is located downstream a positively  
277 charged amino acid (such as Lysine or Arginine). Hence, it could be a plausible candidate for  
278 cleavage of NHBA in saliva, since NHBA contains an Arginine-rich region that is highly conserved  
279 among different *N. meningitidis* strains and that could act as target for hKLK1 proteolytic cleavage.

280 To further investigate this matter, recombinant human kallikrein1, kallikrein1 purified from human  
 281 plasma (commercially available) and human saliva were incubated with recombinant NHBA  
 282 protein. SDS-PAGE analysis showed that both recombinant hKLK1 (lane 3-6, Fig. 5) and hKLK1  
 283 purified from human plasma (lane 7-10, Fig. 5) were able to proteolytically cleave NHBA with  
 284 fragmentation patterns identical to that induced in saliva (lane 2, Fig. 5). Proteolytic cleavage  
 285 resulted in the generation of two main fragments (highlighted with red arrow in Fig. 5), which  
 286 amount increased, increasing the amount of kallikrein, in a dose-dependent manner. Moreover, the  
 287 NHBA fragments generated by the cleavage showed an apparent molecular weight comparable to  
 288 the fragments produced by hLf cleavage. [7] These results indicated that KLK1 is the main protease  
 289 responsible for NHBA processing in saliva.

290

291 **Fig. 4. The protease kallikrein 1 was identified in NHBA-cleaving fractions from human**  
 292 **saliva. (A)** Primary sequence of kallikrein 1 identified from saliva fractions able to cleave NHBA.  
 293 Identified peptides by LC-MS/MS are highlighted in red. Blue arrows indicate trypsin cleavage sites.  
 294 **(B)** MS/MS spectra of the peptides identified from kallikrein: m/z values, Mascot score and  
 295 experimental delta mass are reported.

296

297 **Fig. 5. Kallikrein processes NHBA in-vitro.**

298 SDS-PAGE of NHBA cleavage by human kallikrein. All the samples were maintained at 37°C ON  
 299 and then loaded on SDS-Page. Lane 1: NHBA alone; Lane 2: NHBA incubated with human saliva;  
 300 Lane 3-6 : NHBA incubated with recombinant KLK1 (rKLK1) at dilution from 1:500, 1:5000,  
 301 1:50000 and 1:500000; Lane 7-10 : NHBA incubated with human KLK1 (hKLK1) purified from  
 302 human plasma at dilution from 1:500, 1:5000, 1:50000 and 1:500000.

303

304

## **Kallikrein and human lactoferrin promote the formation of two identical fragments**

To identify the exact cleavage site within the NHBA protein promoted by hKLK1 and saliva, we purified the C-terminal fragments generated by their cleavage. Therefore, NHBA was incubated with saliva or with rhKLK1 (recombinant human kallikrein 1) overnight and the resulting fragments were separated by affinity chromatography. Since NHBA was His-tagged at the C-terminus, we used NiNTA resin to bind and purify the cleaved C-terminal fragments, while N-terminal fragments were not bound to the column and released in the flow through (Fig. 2S).

Once the cleaved C-term fragments generated by human saliva and recombinant human kallikrein1 were purified, they were analyzed by mass spectrometry to determine their precise molecular weight, thus allowing identification of the cleavage site of hKLK1 and saliva within the NHBA protein. Intact mass determination was performed by positive electrospray ionization using a Q-TOF mass spectrometer. For the NHBA C-fragment derived from saliva cleavage, we detected a molecular weight of  $20246.57 \pm 0.14$  Da that was compatible with the primary sequence of the C-terminal region of NHBA starting from Ser<sup>288</sup> (Fig. 6A). Similarly, the NHBA fragment derived from recombinant human kallikrein1 cleavage showed a molecular weight of  $20247.3 \text{ Da} \pm 2 \text{ Da}$  (Fig. 6B) that was also compatible with the same C-terminal sequence starting from Ser<sup>288</sup>. We therefore concluded that the cleavage site of both hKLK1 and saliva was located immediately downstream to the Arginine rich region at the level of Ser 288, and corresponded to the cleavage site of hLF [7].

### **Fig. 6. Intact mass measurement of NHBA C-terminal fragments obtained from kallikrein cleavage.**

Intact mass determination was performed by ESI-Q-TOF. A) The NHBA C-fragment after saliva cleavage showed an observed molecular weights of 20246.57 Da, compatible with the primary sequence of C-terminal region of NHBA starting from Ser288. B) NHBA fragment after

recombinant human kallikrein1 cleavage showed a molecular weight of 20247.3 Da. C) Amino acid sequence of recombinant NHBA (NZ) full-length protein: Arg-rich motif is indicated in bold, cleavage site of epithelial cells proteases is indicated with a black arrow and amino acid sequence of newly generated C-terminal fragment is highlighted in gray.

## NHBA and kallikrein in *Neisseria meningitidis* bacteria

Since *in-vitro* data proved that hKLK1 was the main protease in saliva responsible for the proteolytic cleavage of NHBA into two main fragments, the N- and C-terminal, we further verified their ability to process NHBA on native protein expressed on the surface of live bacteria.

To test NHBA processing on live bacteria, *Neisseria meningitidis* MC58 wild-type strain and the relative knock-outs for *nalP* gene (coding for the meningococcal serine protease able to cleave NHBA) and *NHBA* gene, as control strains, were grown at 32°C to simulate the nasopharyngeal environment [14], and then treated with hKLK1 or saliva. After 30 minutes, samples were collected and the presence of the NHBA C-terminal domain was assessed either into supernatants by Western blot analysis (Fig. 7A) or on bacterial surface by FACS analysis (Fig. 7B). As previously reported [7], the NHBA-C terminal fragment derived for cleavage of meningococcal NalP protease, named C2, could be detected in supernatant of MC58 wt (Fig. 7A, lane 4). In addition, a shorter NHBA C-terminal fragment was observed in the supernatant of bacteria incubated with hKLK1 or saliva (Fig. 7A, lane 5 and 6) with an apparent molecular weight identical to the NHBA C-terminal fragment generated by hLF, named C1 [7]. Moreover, while NHBA protein was not cleaved by meningococcal proteases, as in MC58 $\Delta$ *nalp*, the NHBA C-terminal fragment was only detected in the supernatant of bacteria incubated with hKLK1 or saliva (Fig. 7A, lane 8 and 9), indicating that both treatment led to an accumulation of NHBA C-terminal fragment into the supernatant. Of note, we observed the NHBA full-length protein in all samples of both MC58 wt (lanes 4-6) and MC58 $\Delta$ *nalp* strain (lanes 7-9), while it was not present in the MC58  $\Delta$ *NHBA* strain (lanes 10-12).



357 All samples treated with saliva showed a signal at a molecular weight a little bit higher than the C-  
358 fragment (red arrow in lane 6, 9 and 12), which is an unspecific signal of the polyclonal serum used  
359 on the saliva sample.

360 These data show that NHBA C-fragments produced by either hKLLK1 or saliva have the identical  
361 molecular weights, whereas the molecular weight of the C-fragment produced by NalP cleavage  
362 (C2 fragment) is different.

363 Evidence that hKLLK1 and saliva cleaved NHBA protein on live bacteria was further supported by  
364 FACS analysis. Therefore, following protease treatments, bacteria were stained with anti NHBA C-  
365 terminal – FITC antibody and the amount of C-terminal domain on surface-exposed NHBA protein  
366 was determined by measuring fluorescent intensity. As reported in Fig. 7B, no differences were  
367 observed in MC58wt strain comparing treated and untreated bacteria. In addition, the basal level of  
368 NHBA C-terminal domain present on the bacterial surface was very low in untreated samples.  
369 Likely, most of the NHBA exposed on the bacterial surface was already processed by  
370 meningococcal proteases at the time of treatment, since this strain highly expressed NalP protease.  
371 On the contrary, for the *nalp* knockout mutant, in which most of the surface exposed NHBA protein  
372 was present in its full-length form, the amount of NHBA C-terminal domain on the bacterial surface  
373 decreased after treatment with hKLLK1 or saliva. This reduction was particularly significant for  
374 samples incubated with hKLLK1.

375 These results indicate that both saliva and hKLLK1 were able to cleave NHBA on live bacteria and  
376 the generation and release of NHBA C-terminal domain from the bacterial surface resulted in the  
377 accumulation of C-terminal fragment into the supernatant.

378

379 **Fig. 7. NHBA cleavage by human kallikrein and saliva occurs on live bacteria.**

380 Western Blotting assay, using  $\alpha$ -NHBA - C - fragment polyclonal antibody. Lane 1: NHBA wild  
381 type recombinant protein; lane 2 : NHBA - AB recombinant fragment; lane 3 : NHBA recombinant  
382 C-fragment; lane 4: MC 58 wild type supernatant; lane 5: MC58 wild type supernatant following

383 incubation with kallikrein; lane 6: MC58 wild type supernatant following incubation with saliva;  
 384 lane 7: MC 58  $\Delta$ NalP supernatant; lane 8: MC58  $\Delta$ NalP supernatant following incubation with  
 385 kallikrein; lane 9: MC58  $\Delta$ NalP supernatant following incubation with saliva; lane 10: MC58  
 386  $\Delta$ NHBA supernatant; lane 11:  $\Delta$ NHBA supernatant incubated with kallikrein; lane 12: MC58  
 387  $\Delta$ NalP supernatant incubated with saliva. B) FACS analysis of MC58wt, MC58 $\Delta$ nalp and  
 388 MC58 $\Delta$ nhba strains stained with anti NHBA C-terminal-FITC antibody. Bacteria were incubated  
 389 with for 30 minutes with human kallikrein, saliva or with medium, as negative control. Histograms  
 390 plot the geometric mean of Fluorescence Intensity (FITC). Error bars denote standard deviation.

## Discussion

The role of NHBA in *Neisseria meningitidis* pathogenesis is still unclear. Previous studies have shown that NHBA is able to bind Heparin and GAGs on epithelial cells through the Arg-rich region [12] [16], supporting the hypothesis that NHBA can not only enhance bacterial survival in human serum, but can also play a crucial role during the adhesion step in *Neisseria meningitidis* host colonization [15]. NHBA is cleaved by two specific proteases, NalP, a surface-exposed *Neisseria* serine protease, and human lactoferrin (hLf), present in several human biological fluids like serum, milk and saliva [7]. The fragment generated by proteolytic cleavage can induce a toxic effect on endothelial cells by altering the endothelial permeability [15]. In this study, we have assessed whether the proteolytic cleavage of NHBA could happen in saliva, being the nasopharynx the only known *N. meningitidis* bacterial reservoir, and the first tissue where the bacterium starts its colonization. Understanding the mechanism which allows the bacterium to pass through the human nasopharyngeal epithelium and start its invasive phase is a crucial step to develop a preventive treatment for meningitis disease. For this purpose, we evaluated the possibility that NHBA could be processed by human saliva, the main fluid present in the nasopharyngeal tract. In this work, we demonstrate that NHBA is cleaved *in vitro* by human saliva into two main fragments, an N-terminal fragment (AB) and a C-terminal fragment (C1), and that C1 is the same fragment generated by hLf processing of NHBA; we found, however, that the main actor for NHBA processing in saliva is not hLf but kallikrein1 (KLK1). KLK1 is a human serine protease that cleaves one aminoacid downstream of positively charged amino-acids and is present in several biological fluid as plasma, lymph, urine, saliva and pancreatic juice. We demonstrated that hKLK1 cleavage site on NHBA happens on the Ser 288 just downstream the Arg-rich region, confirming that hKLK1 processes NHBA at the same identical site previously reported for hLf [7].

We have so far three proteases able to cleave NHBA *in vitro*, upstream or downstream the Arg-rich region: meningococcal NalP protease (upstream), that generates fragment C2 containing the Arg-

rich domain, and hLf and hKLK1 (downstream), two human proteases generating fragment C1, in which the Arginine-rich domain is absent. Both fragments are released from the bacteria in to the environment [15].

To further characterize and understand the possible biological relevance of NHBA processing we compared the activity of human saliva with the newly identified NHBA cleaving protease, hKLK1, on the bacterial surface by testing their ability to process NHBA on live bacteria. We showed that NHBA is processed in  $\Delta$ NalP MC58 strain by saliva and by hKLK1 generating an identical peptide with a MW equal to the C1 fragment and it is also processed by NalP, generating the C2 fragment. Both fragments, C1 and C2 are released in the culture medium.

We demonstrated that NHBA can be cleaved on live bacteria releasing two main fragments, C1 and C2, from the bacterial surface. Hence, we speculated whether the two different C-term fragments could play a different role in NHBA mediated *Neisseria* pathogenesis.

The important role of the NHBA Arg-rich region for host colonization and invasion was demonstrated previously for Heparin binding [7] and *Neisseria meningitidis* adhesion to Human Epithelial Cells [16].

It was also shown that C2, but not C1, increases endothelial permeability with a mechanism involving the production of oxygen radicals and the phosphorylation and degradation of adherens-junction protein VE-cadherin. [15]. Since the C2 fragment contains the Arg-rich domain it is plausible that this fragment might interact with secreted or cell-associated proteoglycans in order to exert its biological role [15]. Moreover, the C2 fragment seems to be critical for invasion of human tissues, hence for virulence, and different studies showed the possibility that it is naturally released in the bacterial environment. We can also assume that the C1 fragment, released by *N. meningitidis* in the nasopharyngeal tract in its first colonization phase and processed *in vivo* by KLK1 present in saliva and therefore lacking the Arginine-rich domain responsible for binding to heparin, is not able to adhere on endothelial cell proteoglycans and enter the blood stream [15]. Therefore, hKLK1, and

possibly to a lesser extent hLf, producing an inactive C-fragment, may have a protective role for the host.

The Arg-rich region is highly conserved among different NHBA proteins and across MenB strains [7], suggesting a crucial role in NHBA function in its ability to bind heparin. However, there is yet no concrete explanation why, in the pharyngeal tract, three proteases are involved in NHBA processing, with meningococcal NalP targeting the Arg-rich region upstream, and human KLK1 and human lactoferrin targeting it and downstream. Also it is not clear why a domain which is the target of the front-line host defense mechanism is so widely conserved among *Neisseria* subtypes.

Bacterial colonization in the nasopharyngeal tract is the prerequisite for the *N. meningitidis* invasive phase. Successful colonizers must attach to the epithelial lining, grow on the mucosal surface, evade the host immune response, and penetrate in to the bloodstream. However, the invasive behavior is not part of the normal meningococcal life cycle since, once the colonizer have entered the bloodstream or the central nervous system, they cannot be easily transmitted to other hosts, and blood not only constitutes an immunologically challenging compartment but also an oxygen-limiting environment [23]. Environmental conditions which force the switch of *N. meningitidis* from carriage to invasive are not yet known, and the prevailing way of NHBA cleavage, by NalP producing C2 active fragment or by KLK1 producing C1 inactive fragment, may play a role in signaling to the bacteria the environmental changes required for initiation of the invasive phase.

This aspect opens the possibility that NHBA processing by host proteases would not be solely a host defense mechanism, but could be crucial for the bacterium decision-making process in the carriage-to-virulence switch, hence its conservation among *N. meningitidis* subtypes.

Further studies may consider investigating the environmental conditions which activate or inhibit NalP or KLK1 functions, and how these could affect meningococcus virulence and invasiveness.

## 467 **Acknowledgments**

468 The authors want to thank Silvana Savino, Mariagrazia Pizza, Beatrice Aricò and Vega Massignani  
469 (GSK, Siena, Italy) for useful discussion, and Antonietta Maiorino for rewing the paper in the  
470 original language.

471 Bexsero is a trademark of the GSK group of companies.

## 472 473 **Funding and conflict of interest statement**

474  
475 This work was sponsored and funded by GlaxoSmithKline Biologicals SA. The authors have  
476 declared that no conflicts of interest exist. Sara Marchi, Massimiliano Biagini, Vincenzo Nardi-Dei,  
477 Silvia Rossi Paccani, Mariagrazia Pizza and Elena Cartocci were employees of Novartis Vaccines  
478 at the time of the study; in March 2015 the Novartis non-influenza Vaccines business was acquired  
479 by the GSK group of companies. Sara Marchi, Massimiliano Biagini, Vincenzo Nardi-Dei, Silvia  
480 Rossi Paccani, Mariagrazia Pizza and Elena Cartocci are now employees of the GSK group of  
481 companies. Martina Di Fede was a PhD Student of the University of Siena at the time of the study  
482 and supervised by Novartis Vaccines and Diagnostics Srl (and then by GSK) . Martina Di Fede is  
483 now an employee at Institute für Virologie und Medizinische Biochemie, Westfälische Wilhelms-  
484 Universität Münster, Von-Esmarch-Str. 56, 48149, Münster, Germany.

485 Elisa Pantano was a student of the University of Perugia at the time of the study (Internship)  
486 supervised by Novartis Vaccines and Diagnostic Srl (and then by GSK) . Elisa Pantano is now  
487 employee of the GSK group of companies.

488 There is no financial conflict of interest.

489  
490  
491

## 492 **Authors' contribution**

493

494 Conceived and designed the experiments: Elena Cartocci

495 Performed *in vitro* experiments: Elisa Pantano

496 Performed depletion of lactoferrin from saliva: Sara Marchi, Vincenzo Nardi-Dei

497 Performed FACS analysis: Silvia Rossi Paccani and Martina Di Fede

498 Performed MS analysis: Massimiliano Biagini

499 Analyzed the data: Elisa Pantano, Elena Cartocci, Sara Marchi, Vincenzo Nardi-Dei, Massimiliano

500 Biagini

501 Wrote the paper: Elisa Pantano

502 Reviewed and approved the final version of the manuscript: all authors.

503

504

# References

1. Broome, CV. The carrier state: *Neisseria meningitidis*. J Antimicrob Chemother. 1986 Jul;18 Suppl A:25-34.
2. Cartwright, K. A., Stuart, J. M., Jones, D. M. & Noah, N. D. (1987). The Stonehouse survey: nasopharyngeal carriage of meningococci and *Neisseria lactamica*. Epidemiol Infect 99, 591–601.
3. Stephens, D. S. (1999). Uncloaking the meningococcus: dynamics of carriage and disease. Lancet 353, 941–942.
4. Dominique A. Caugant, and Martin C.J. Maiden. Meningococcal carriage and disease- Population biology and evolution. Vaccine. 2009 Jun 24; 27(4): B64–B70. doi: 10.1016/j.vaccine.2009.04.061
5. Yazdankhah SP, Caugant DA. *Neisseria meningitidis*: an overview of the carriage state. J Med Microbiol. 2004 Sep; 53(Pt 9):821-32. doi: 10.1099/jmm.0.45529-0.
6. Giuliani MM1, Adu-Bobie J, Comanducci M, Aricò B, Savino S, Santini L, Brunelli B, Bambini S, Biolchi A, Capecchi B, Cartocci E, Ciocchi L, Di Marcello F, Ferlicca F, Galli B, Luzzi E, Maignani V, Serruto D, Veggi D, Contorni M, Morandi M, Bartalesi A, Cinotti V, Mannucci D, Titta F, Ovidi E, Welsch JA, Granoff D, Rappuoli R, Pizza M. A universal vaccine for serogroup B meningococcus. Proc Natl Acad Sci U S A. 2006 Jul 18;103(29):10834-9. Epub 2006 Jul 6. doi:10.1073/pnas.0603940103
7. Serruto D, Spadafina T, Ciocchi L, Lewis LA, Ram S, Tontini M, Santini L, Biolchi A, Seib KL, Giuliani MM, Donnelly JJ, Berti F, Savino S, Scarselli M, Costantino P, Kroll JS, O'Dwyer C, Qiu J, Plaut AG, Moxon R, Rappuoli R, Pizza M, Aricò B. *Neisseria meningitidis* GNA2132, a heparin-binding protein that induces protective immunity in humans. Proc Natl Acad Sci U S A. 2010 Feb 23;107(8):3770-5. doi: 10.1073/pnas.0915162107.



- 530           **8.** Yazdankhah SP, Caugant DA. Neisseria meningitidis: an overview of the carriage state.  
531           J Med Microbiol. 2004 Sep; 53(Pt 9):821-32. doi: 10.1099/jmm.0.45529-0.
- 532           **9.** Nasser NJ, Thoms J, Soosaipillai A, Pintilie M, Wang R, Diamandis EP, Bristow RG.  
533           Human tissue Kallikreins: Blood levels and response to radiotherapy in intermediate risk  
534           prostate cancer. Radiother Oncol. 2017 Apr 17. pii: S0167-8140(17)30142-1. doi:  
535           10.1016/j.radonc.2017.03.023.
- 536           **10.** Yazdankhah SP, Caugant DA. Neisseria meningitidis: an overview of the carriage state.  
537           J Med Microbiol. 2004 Sep; 53(Pt 9):821-32. doi: 10.1099/jmm.0.45529-0.
- 538           **11.** Stephens DS, Hoffman LH, McGee ZA. Interaction of Neisseria meningitidis with  
539           human nasopharyngeal mucosa: attachment and entry into columnar epithelial cells. J  
540           Infect Dis. 1983 Sep;148(3):369-76.
- 541           **12.** Pujol C, Eugène E, de Saint Martin L, Nassif X. Interaction of Neisseria meningitidis  
542           with a polarized monolayer of epithelial cells. Infection and Immunity.  
543           1997;65(11):4836-4842.
- 544           **13.** Sutherland TC, Quattroni P, Exley RM, Tang CM. Transcellular passage of Neisseria  
545           meningitidis across a polarized respiratory epithelium. Infect Immun. 2010  
546           Sep;78(9):3832-47. doi: 10.1128/IAI.01377-09.
- 547           **14.** Stephens DS, Hoffman LH, McGee ZA. Interaction of Neisseria meningitidis with  
548           human nasopharyngeal mucosa: attachment and entry into columnar epithelial cells. J  
549           Infect Dis. 1983 Sep;148(3):369-76.
- 550           **15.** Casellato A, Rossi Paccani S, Barrile R, Bossi F, Ciucchi L, Codolo G, Pizza M, Aricò  
551           B, de Bernard M. The C2 fragment from Neisseria meningitidis antigen NHBA increases  
552           endothelial permeability by destabilizing adherens junctions. Cell Microbiol. 2014  
553           Jun;16(6):925-37. doi: 10.1111/cmi.12250.
- 554           **16.** Vacca I, Del Tordello E, Gasperini G, Pezzicoli A, Di Fede M, Rossi Paccani S, Marchi  
555           S, Mubaiwa TD, Hartley-Tassell LE, Jennings MP, Seib KL, Massignani V, Pizza M,

- Serruto D, Aricò B, Delany I. Neisserial Heparin Binding Antigen (NHBA) Contributes to the Adhesion of Neisseria meningitidis to Human Epithelial Cells. PLoS One. 2016 Oct 25;11(10):e0162878. doi: 10.1371/journal.pone.0162878.
17. Mathieu Coureuil, Olivier Join-Lambert, Hervé Lécuyer, Sandrine Bourdoulous, Stefano Marullo, and Xavier Nassif. Mechanism of meningeal invasion by Neisseria meningitidis. Virulence. 2012 Mar 1; 3(2): 164–172. doi: 10.4161/viru.18639
18. Elena Del Tordello, Irene Vacca, Sanjay Ram, Rino Rappuoli, and Davide Serruto. Neisseria meningitidis NalP cleaves human complement C3, facilitating degradation of C3b and survival in human serum. Microbiology. Proc Natl Acad Sci U S A. 2014 Jan 7; 111(1): 427–432. Published online 2013 Dec 23. doi: 10.1073/pnas.1321556111 PMCID: PMC3890809.
19. Nadine G. Rouphael and David S. Stephens. Neisseria meningitidis: Biology, Microbiology, and Epidemiology. Methods Mol Biol. 2012; 799: 1–20. doi: 10.1007/978-1-61779-346-2\_1. PMCID: PMC4349422.
20. Serruto Davide, J Bottomley Matthew, Ram Sanjay, M Giuliani Marzia, and Rappuoli Rino. The new multicomponent vaccine against meningococcal serogroup B, 4CMenB: immunological, functional and structural characterization of the antigens. Vaccine. 2012 May 30; 30(0 2): B87–B97. doi: 10.1016/j.vaccine.2012.01.033
21. Esposito V, Musi V, de Chiara C, Veggi D, Serruto D, Scarselli M, Kelly G, Pizza M, Pastore A. Structure of the C-terminal domain of Neisseria heparin binding antigen (NHBA), one of the main antigens of a novel vaccine against Neisseria meningitidis. J Biol Chem. 2011 Dec 2; 286(48):41767-75. doi: 10.1074/jbc.M111.289314. Epub 2011 Sep 29.
22. Tettelin H, Saunders NJ, Heidelberg J, Jeffries AC, Nelson KE, Eisen JA, Ketchum KA, Hood DW, Peden JF, Dodson RJ, Nelson WC, Gwinn ML, DeBoy R, Peterson JD, Hickey EK, Haft DH, Salzberg SL, White O, Fleischmann RD, Dougherty BA, Mason

- T, Ciecko A, Parksey DS, Blair E, Cittone H, Clark EB, Cotton MD, Utterback TR, Khouri H, Qin H, Vamathevan J, Gill J, Scarlato V, Massignani V, Pizza M, Grandi G, Sun L, Smith HO, Fraser CM, Moxon ER, Rappuoli R, Venter JC. Complete genome sequence of *Neisseria meningitidis* serogroup B strain MC58. *Science*. 2000 Mar 10;287(5459):1809-15.
23. Schoen C, Kischkies L, Elias J, Ampattu BJ. Metabolism and virulence in *Neisseria meningitidis*. *Frontiers in Cellular and Infection Microbiology*. 2014 Aug 20; 4: 114. doi: 10.3389/fcimb.2014.00114
24. Roupael N.G., Stephens D.S. *Neisseria meningitidis*: biology, microbiology, and epidemiology. *Methods Mol Biol*. 2012; 799:1-20.
25. Arenas J, Nijland R, Rodriguez FJ, Bosma TN, Tommassen J. Involvement of three meningococcal surface-exposed proteins, the heparin-binding protein Nhba, the  $\alpha$ -peptide of IgA protease and the autotransporter protease NalP, in initiation of biofilm formation. *Mol Microbiol*. 2013 Jan;87(2):254-68.

## Supporting information

### S1 Fig. Saliva fractionation on AEC.

Chromatogram of the Anion Exchange chromatography. Red box highlights fractions with major protease activity on NHBA.

### S2 Fig. NHBA fragments purification after digestion with saliva and kallikrein.

A) SDS PAGE of C-fragment purification after saliva NHBA processing. Lane 1: NHBA recombinant protein alone; lane 2: NHBA recombinant protein incubated with saliva ON at 37°C; lane 3: NiNTA flow through fractions; lane 4 and 5: NiNTA column washes; lane 6 and 7: elution fractions from the NiNTA column which contain the C fragment. B) SDS PAGE of C-fragment purification from recombinant kallikrein NHBA processing. Lane 1: NHBA recombinant protein alone; lane 2: NHBA recombinant protein incubated with recombinant kallikrein ON at 37°C; lane 3 : NiNTA flow through fractions; lane 4 and 5: NiNTA column washes; lane 6 and 7 : elution fractions from the NiNTA column which contain the C fragment.

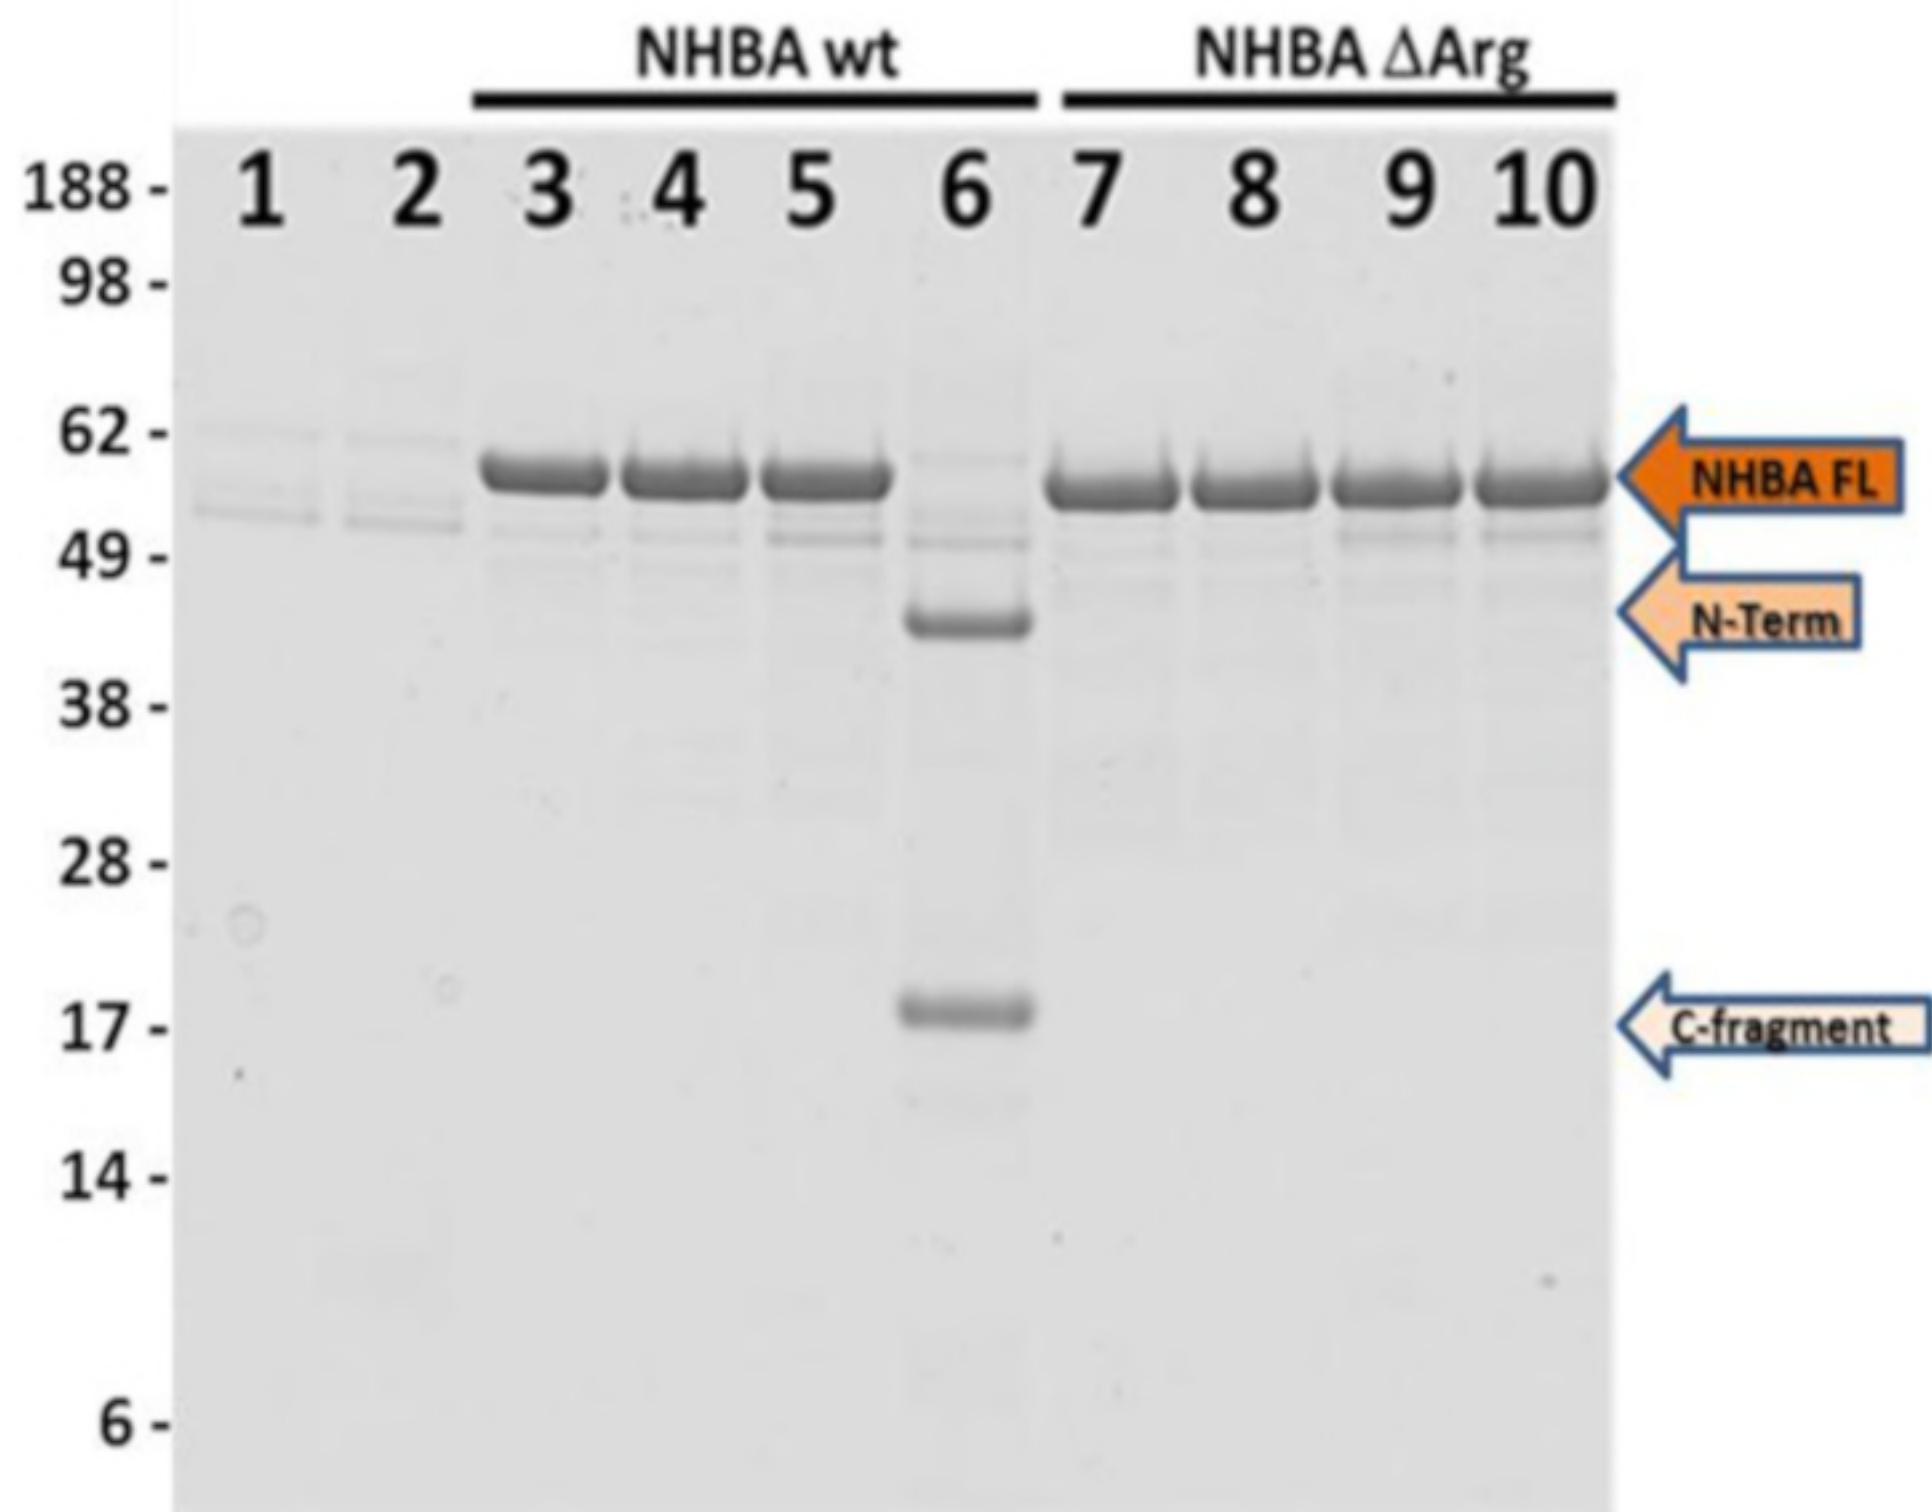

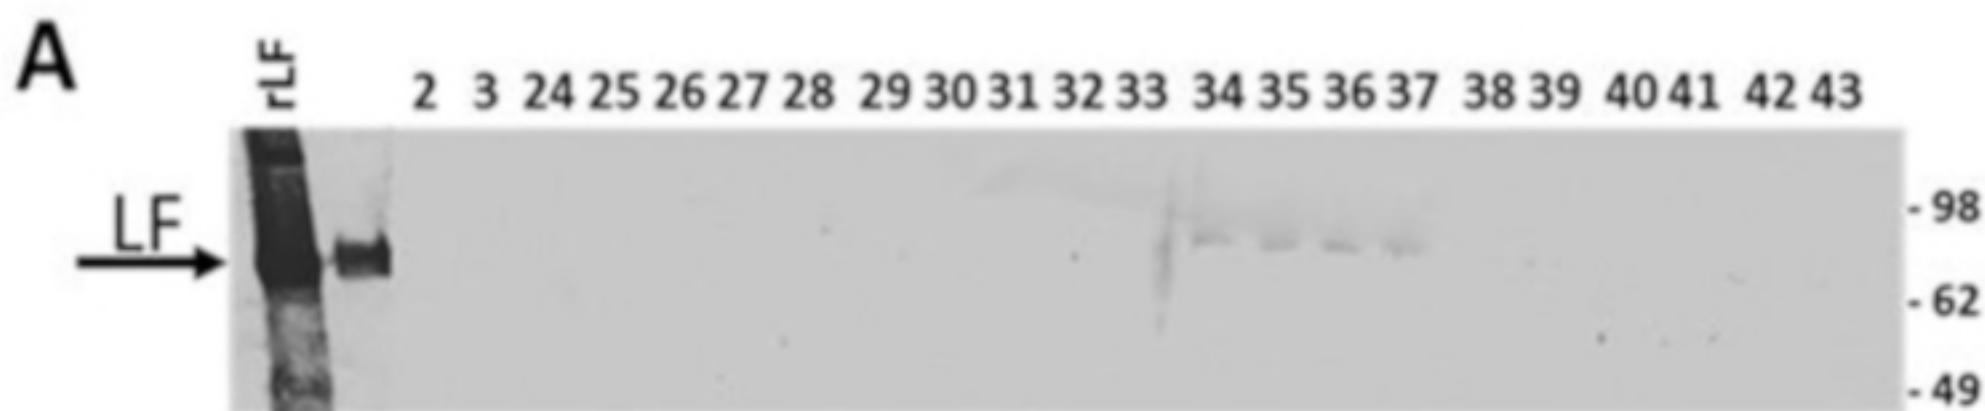

bioRxiv preprint doi: <https://doi.org/10.1101/395998>; this version posted August 20, 2018. The copyright holder for this preprint (which was not certified by peer review) is the author/funder, who has granted bioRxiv a license to display the preprint in perpetuity. It is made available under aCC-BY 4.0 International license.

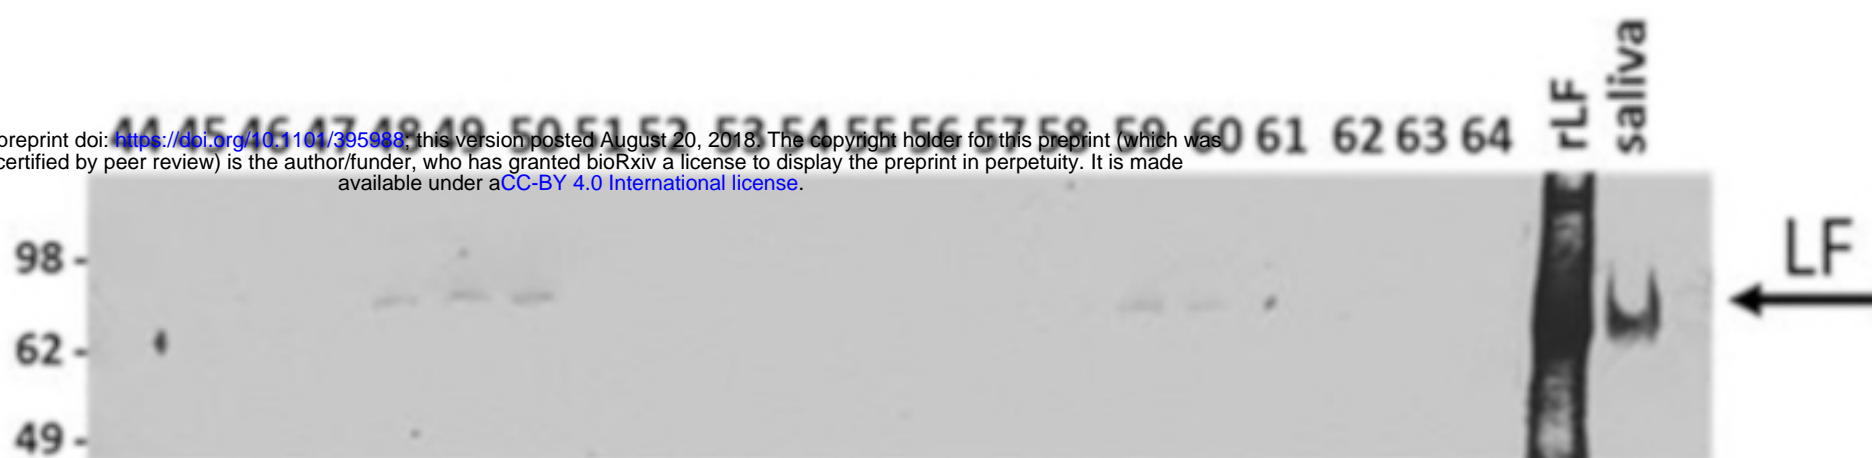

**B**

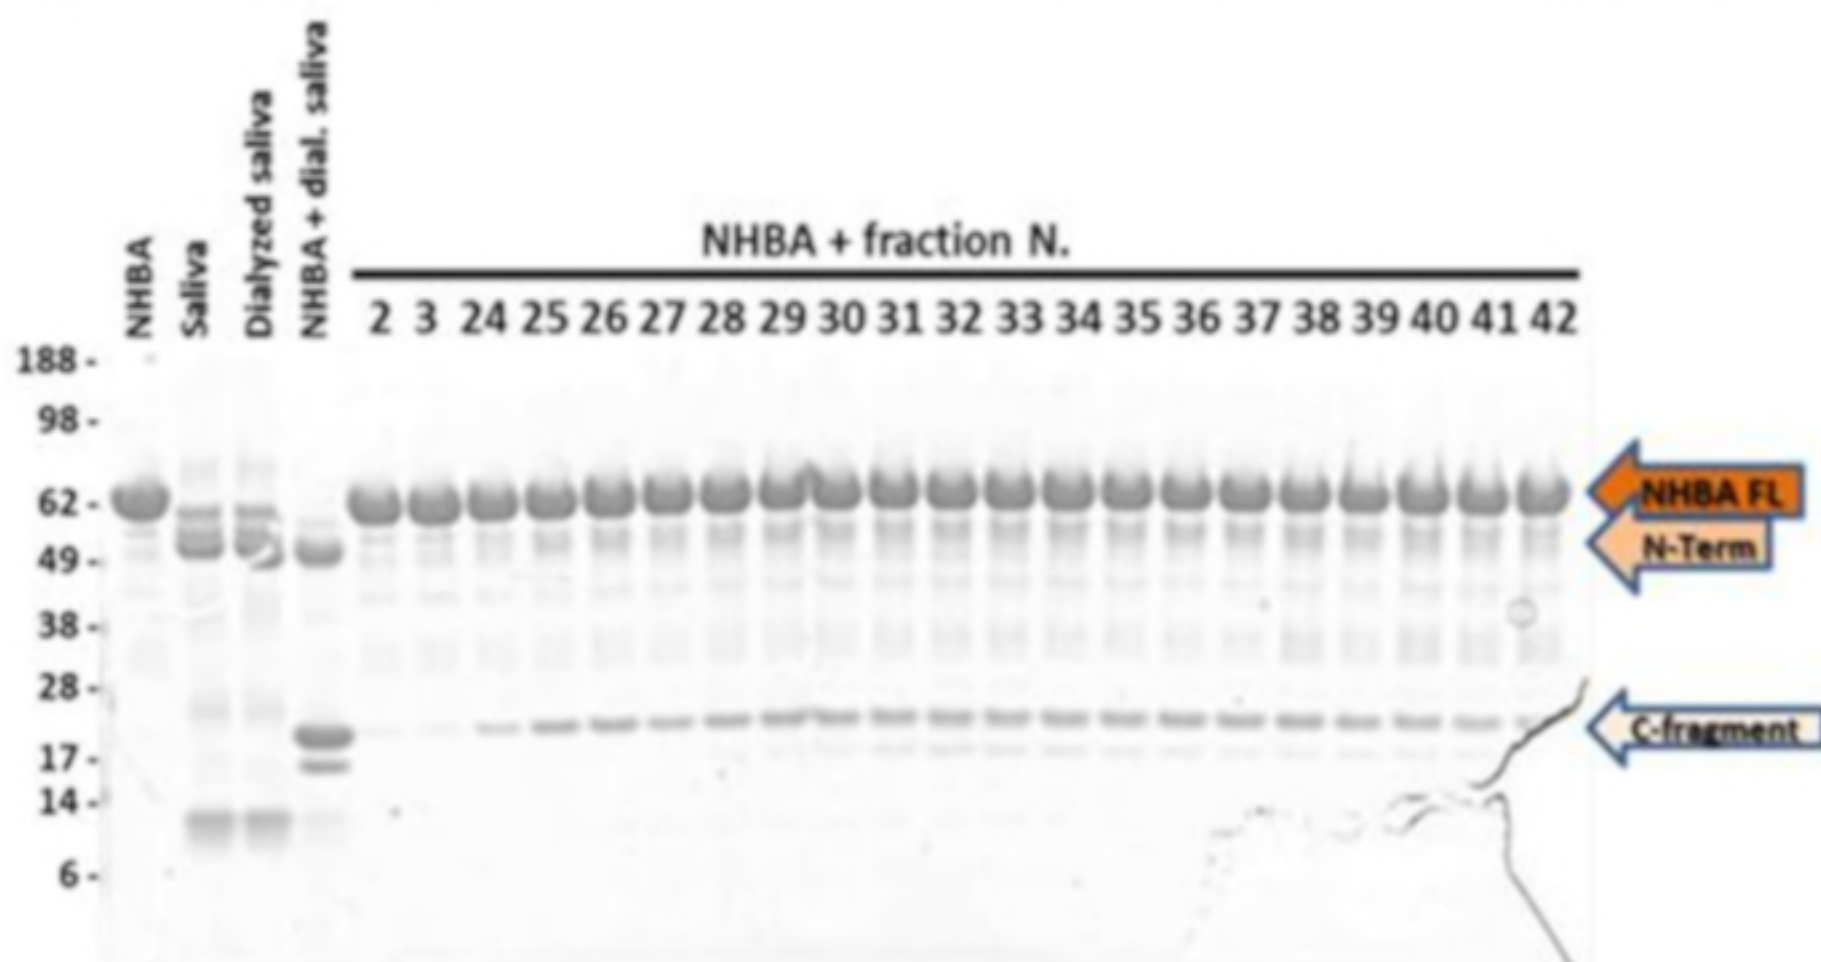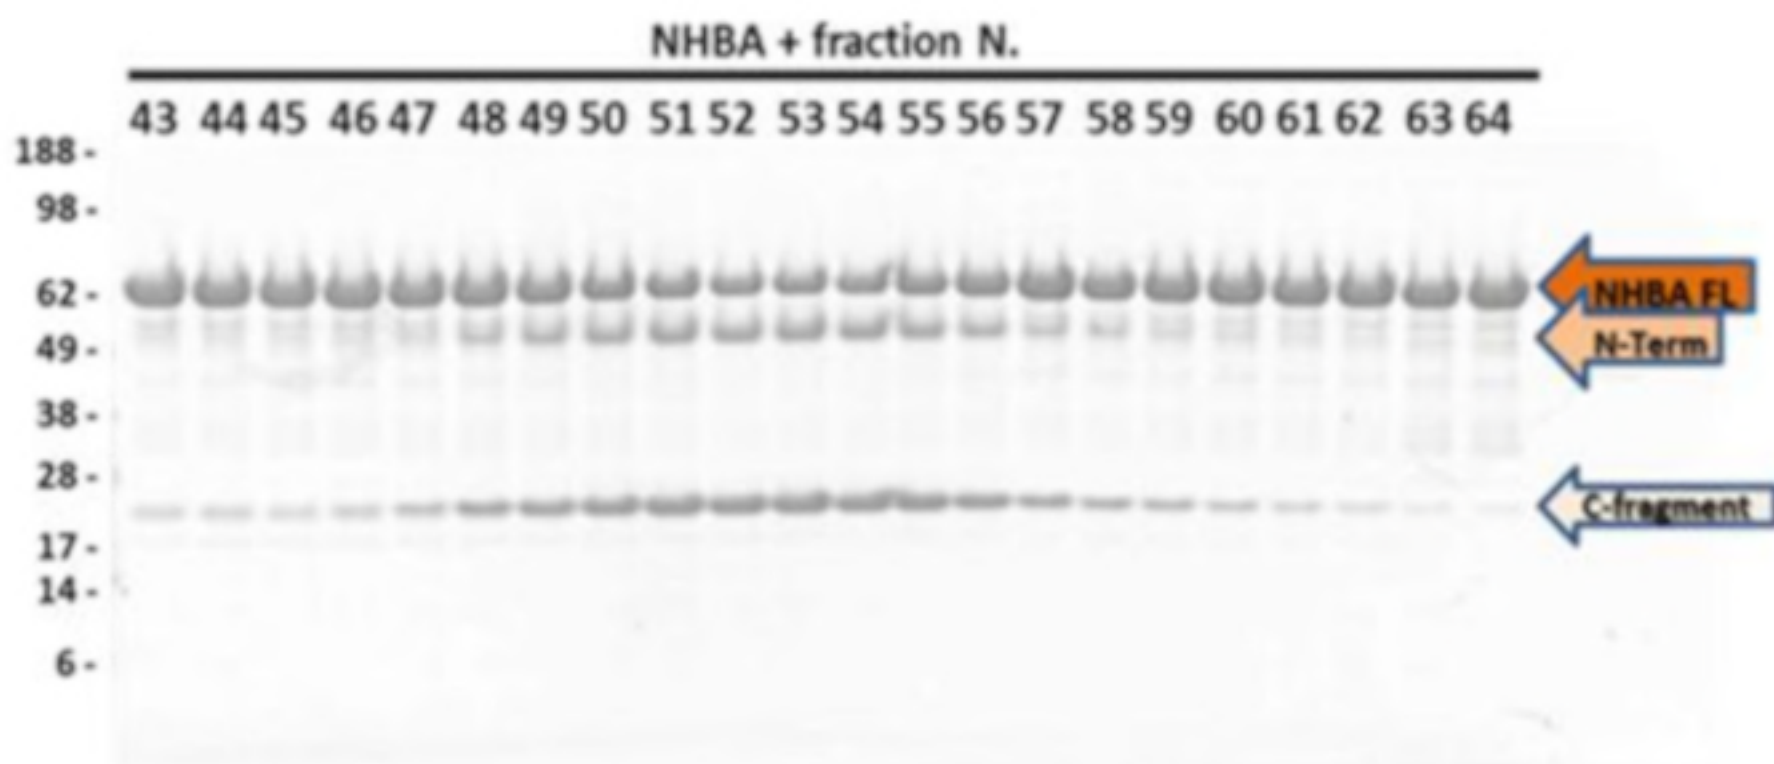

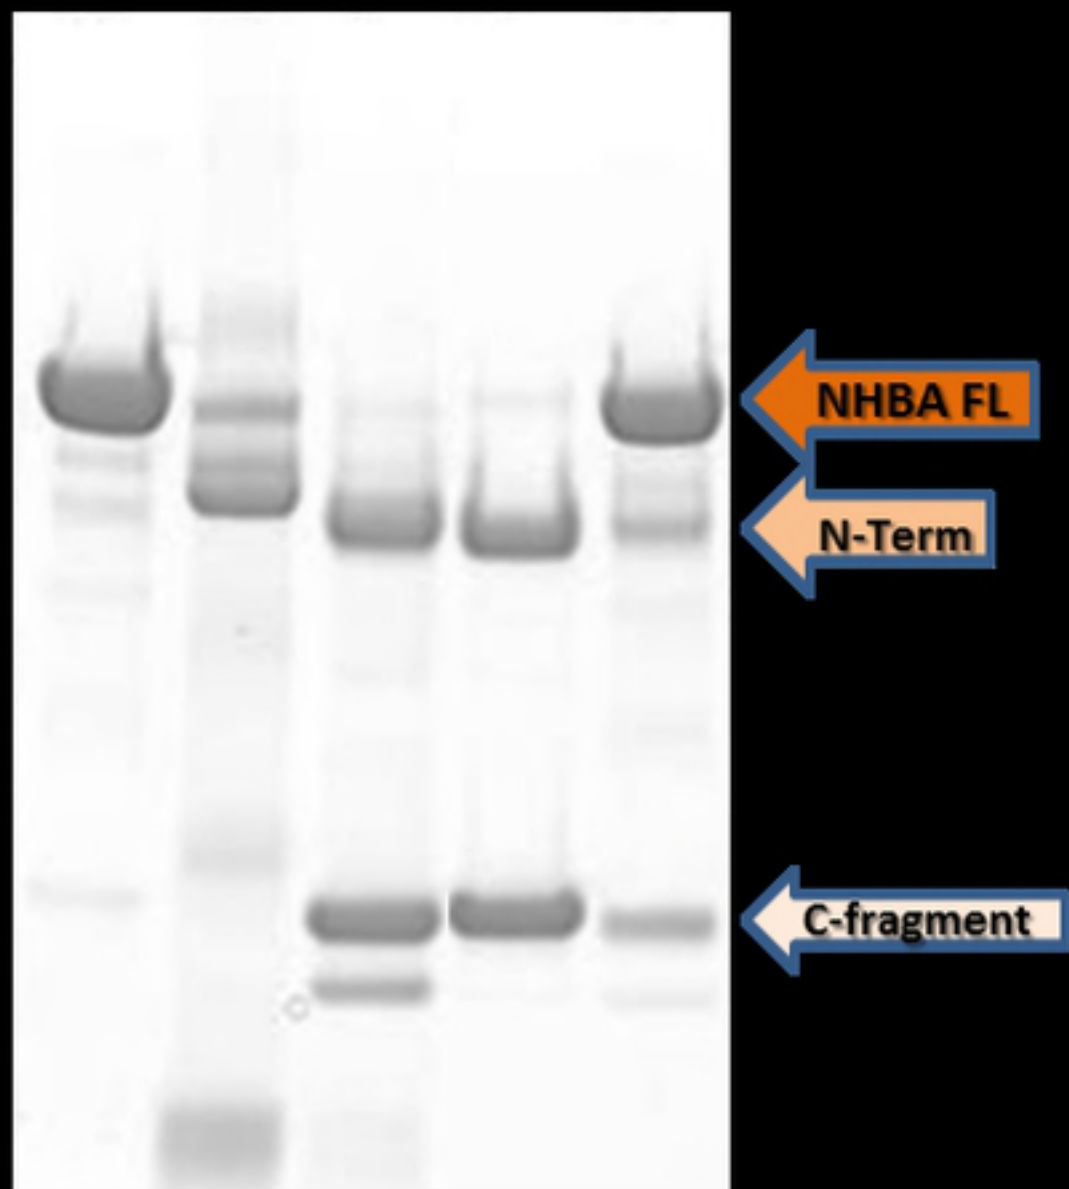



**A** kallikrein 1, renal/pancreas/salivary [Homo sapiens] – AAM11874.1 – 28860 Da

MWFLVLCALSLGGTGAAPPIQSRIVGGWECEQHSQPWQAALYHFSTFQCGGILVHRQWVLTAAHCISDNYQL  
WLGRHNLFFDENTAQFVHVSESFPHPGFNMSLLENHTR↓**QAEDYSHDLMLLR**↓**LTEPADTITDAVK**↓VVEL  
PTQEPEVGSTCLASGWGSIEPENFSFPDDLQCVDLKILPNDECKKAHVQKVTDFMLCVGHLEGGKDTCTVGDSGG  
PLMCDGVLQGVTSWGYVPCGTPNKPSVAVRVLSYVKWIEDTIAENS

**B** **QAEDYSHDLMLLR**  
569.2788  $m/z$  – Mascot Score: 105 –  $\Delta m=0.03506$  Da

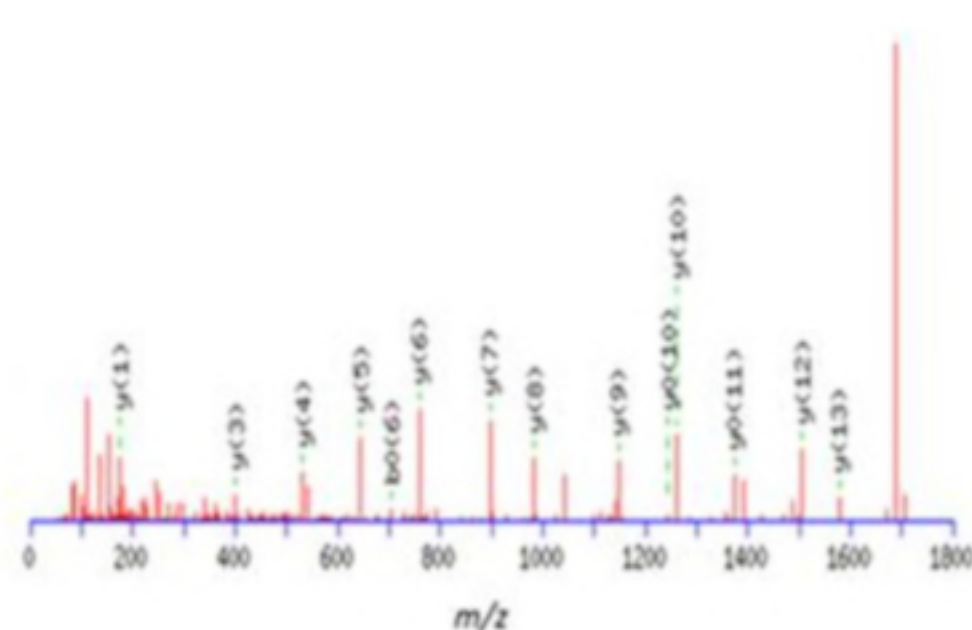

**LTEPADTITDAVK**  
687.3751  $m/z$  – Mascot Score: 74 –  $\Delta m=0.02708$  Da

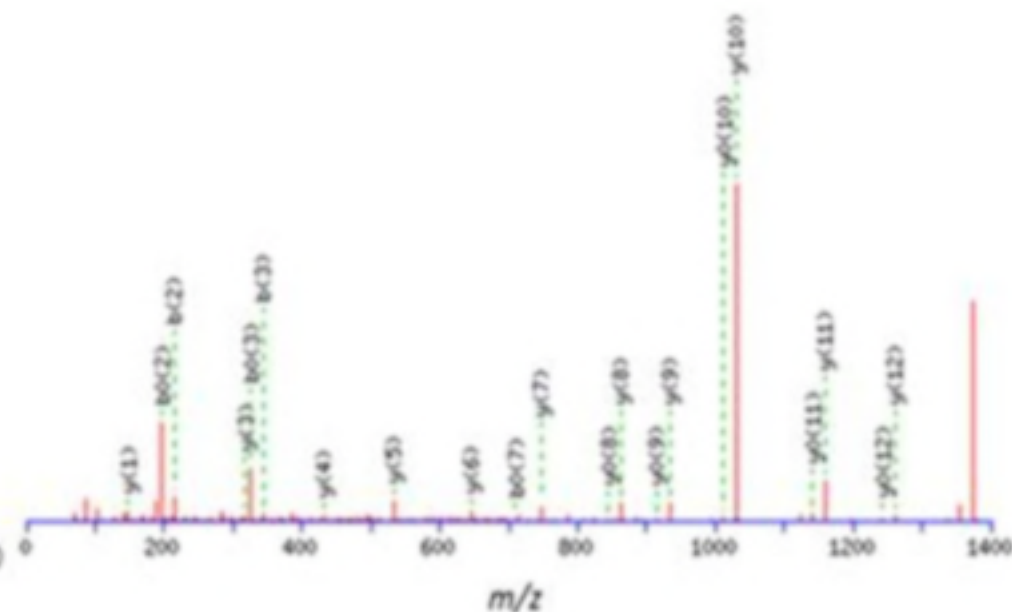



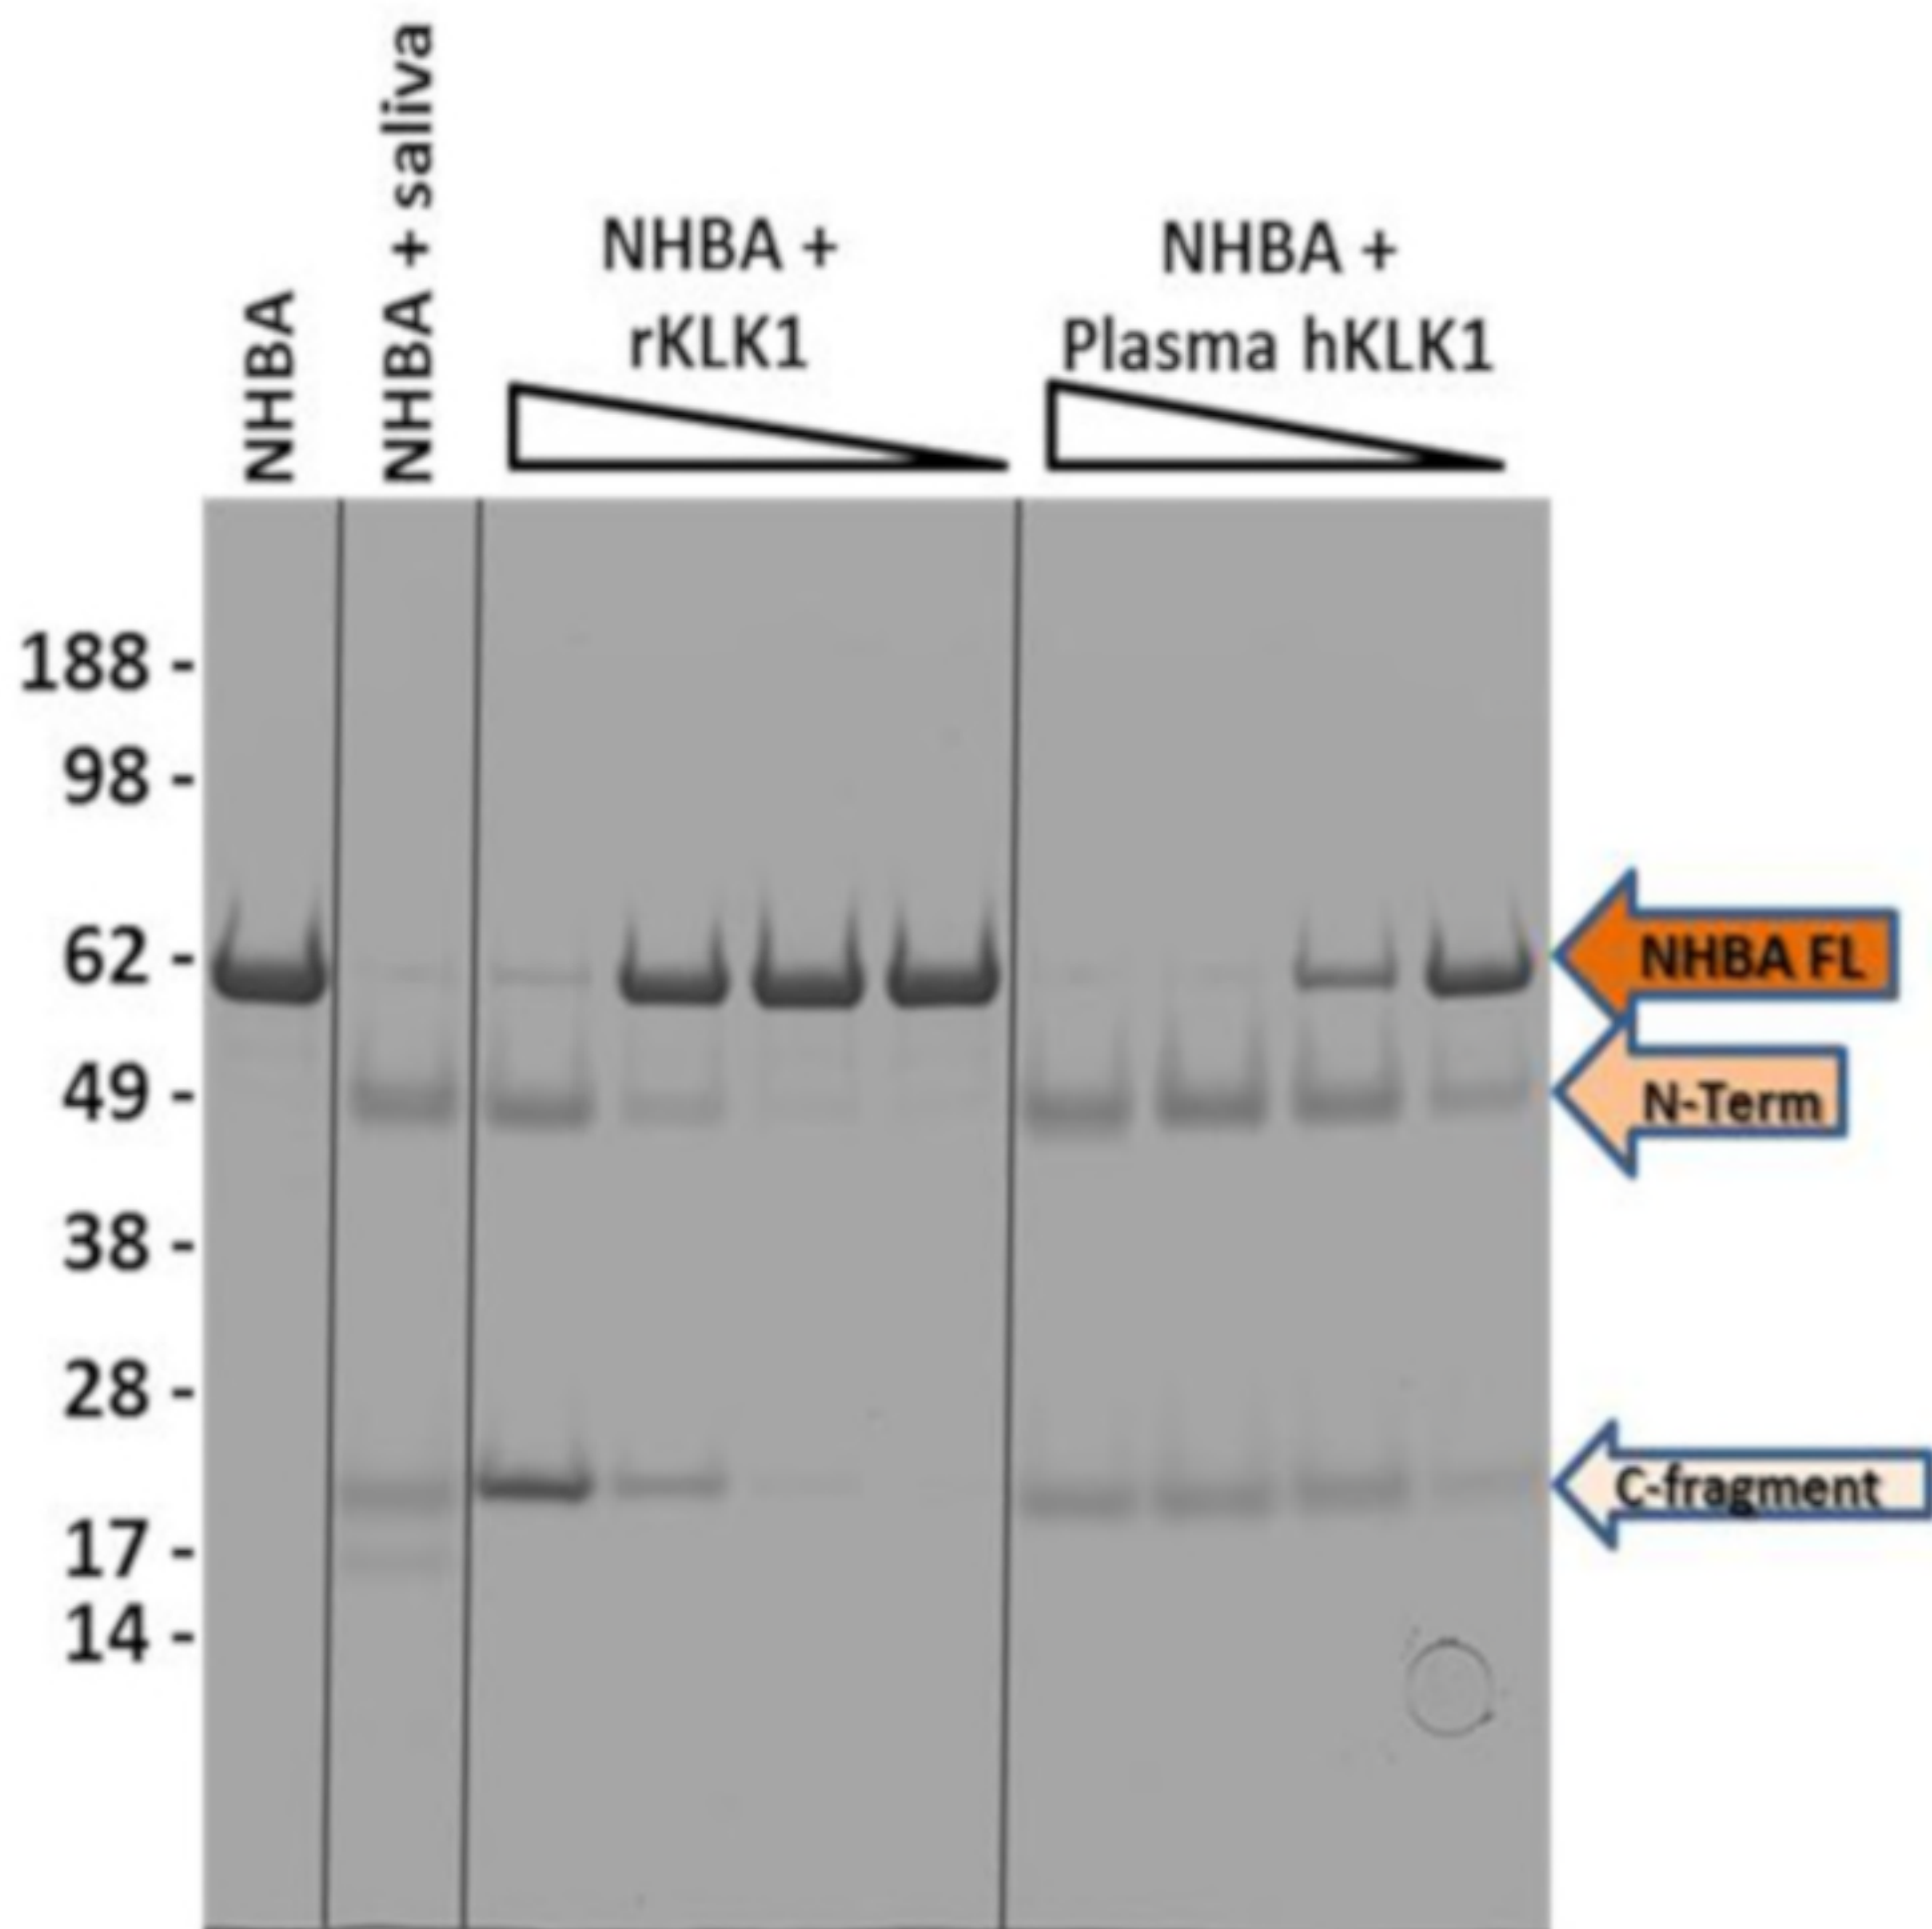

A

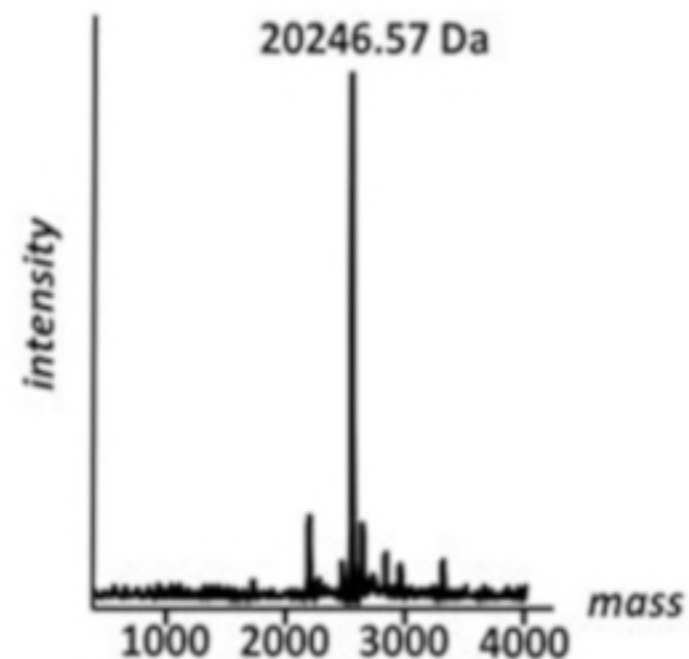

B

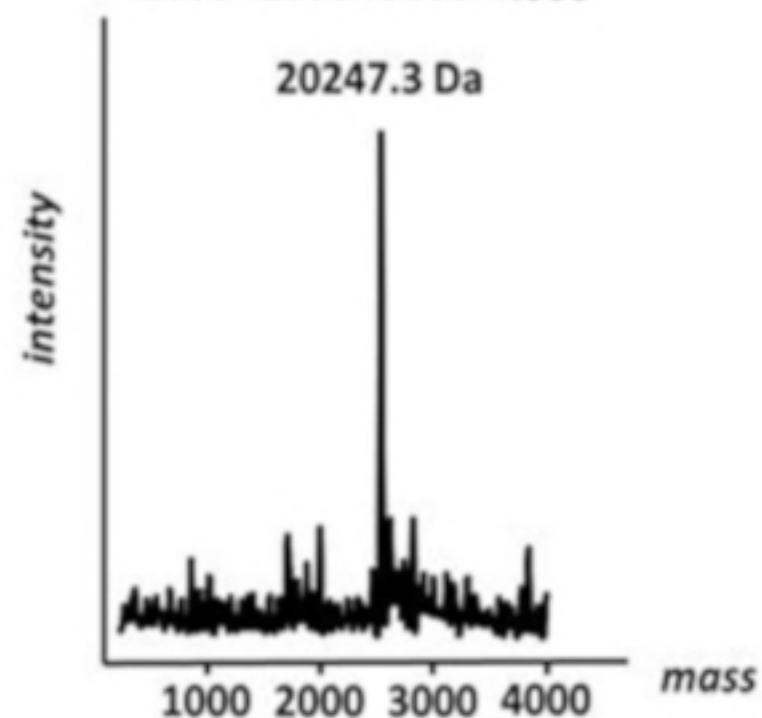

C

MASPDVKSADTLSPAAPVSEKETEAKEDAPQAGSQGGGAPSAQ  
 GGQDMAAVSEENTGNGGAAATDKPKNEDEGAQNDMPQNAADT  
 DSLTPNHTPASNMPAGNMENQAPDAGESEQPANQPDMANTADG  
 MQGDDPSAGGENAGNTAAQGTNQAENNQTAGSQNPASSTNPSA  
 TNSGGDFGRTNVGNVVIDGPSQNITLTHCKGDSCSGNNFLDEEVQ  
 LKSEFEKLSDADKISNYKKDGKNDGKNDKFVGLVADSVQMKGINQYI  
 IFYKPKPTSFARFRRSARSRR↓SLPAEMPLIPVNQADTLIVDGEAVSL  
 TGHSGNIFAPEGNYRYLTYGAEKLPGGSYALRVQGEPSKGEMLAGTA  
 VYNGEVLHFHTENGRPSRGRFAAKVDFGSKSVDGIIDSGDGLHM  
 GTQKFKAIDGNGFKGTWTENGGGDVSGKFYGPAGEEVAGKYSYR  
 PTDAEKGGFGVFAGKKEQDLEHHHHHH

**A**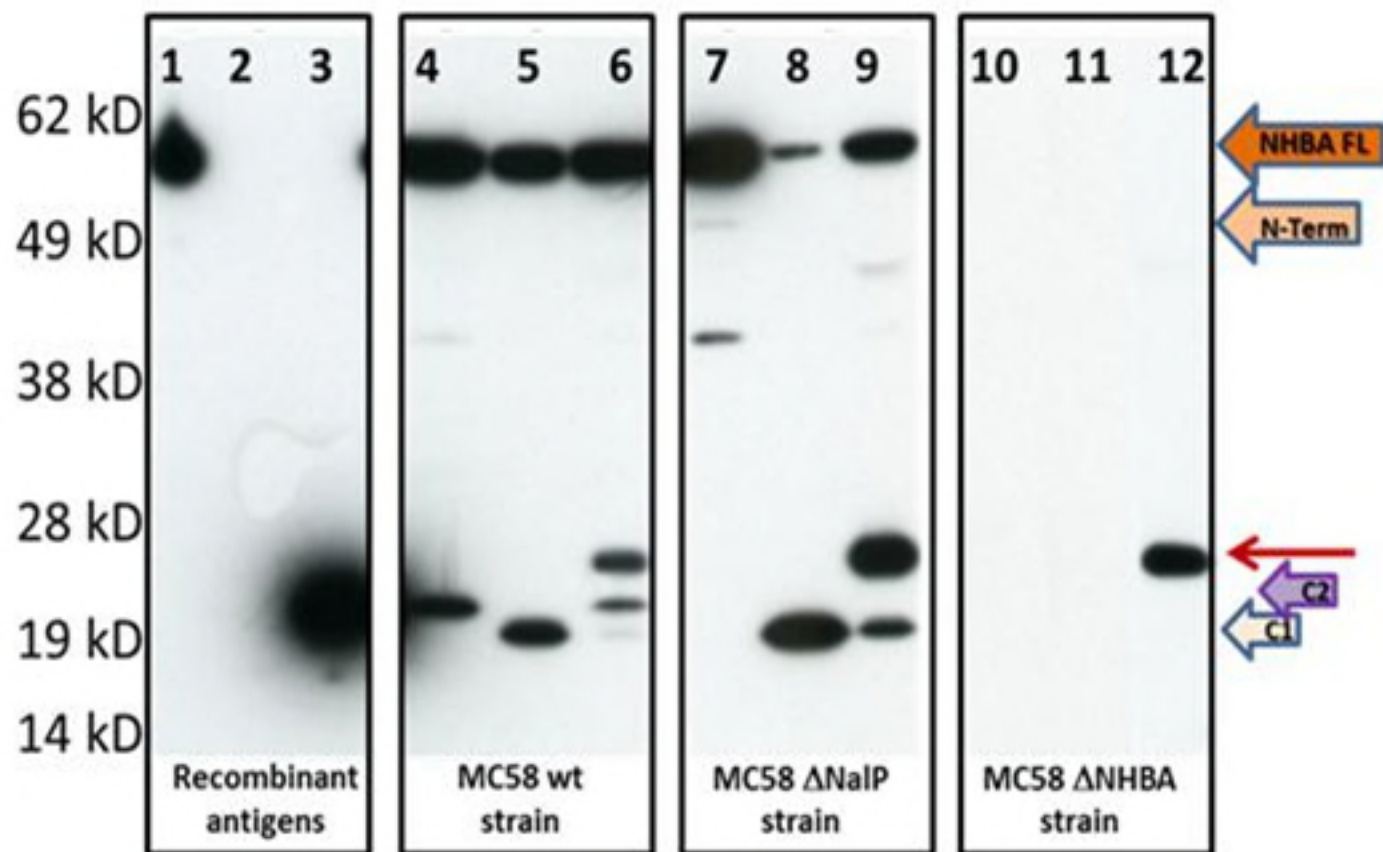**B**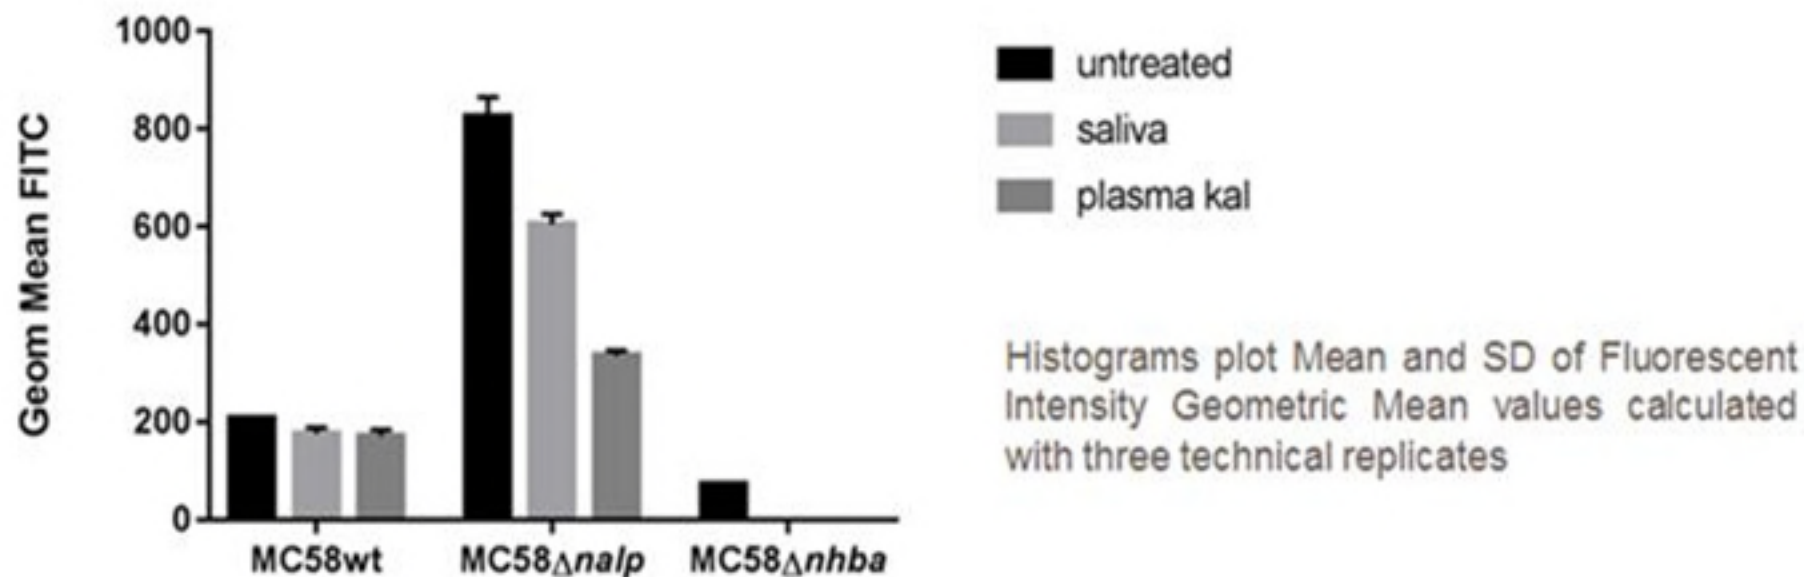

Source: http://biorxiv.org/content/10.1101/395988v1.full.pdf
